# Supplementary material for: OPIA: an open archive of plant images and related phenotypic traits
Source: PubMed Central journal article supplement — Nucleic Acids Res. 2023 Nov 1;52(D1):D1530–7. doi: 10.1093/nar/gkad975 (PMC10767956; doi:10.1093/nar/gkad975), 2023-11-01
Supplement: gkad975_supplemental_file.pdf [file gkad975_supplemental_file.pdf]

**Supplementary Table S1.** Literature information and the URL for accessing the plant image dataset

| Dataset       | URL                                                                                                                                                                               | DOI/PMID                          |
|---------------|-----------------------------------------------------------------------------------------------------------------------------------------------------------------------------------|-----------------------------------|
| MTC_UAV       | <a href="https://git.io/mtc-uav">https://git.io/mtc-uav</a>                                                                                                                       | 10.1109/TGRS.2021.3058962         |
| MTC           | <a href="https://sites.google.com/site/poppinace/">https://sites.google.com/site/poppinace/</a>                                                                                   | 29118821                          |
| WED           | <a href="https://github.com/simonMadec">https://github.com/simonMadec</a>                                                                                                         | 10.1016/j.agrformet.2018.10.013   |
| URC           | <a href="https://github.com/xdbai-source/Rice-Plant-Counting">https://github.com/xdbai-source/Rice-Plant-Counting</a>                                                             | 37040495                          |
| RPC           | <a href="https://git.io/sfc2net">https://git.io/sfc2net</a>                                                                                                                       | 33313541                          |
| GrainSpaceM   | <a href="https://github.com/hellodfan/GrainSpace">https://github.com/hellodfan/GrainSpace</a>                                                                                     | 10.48550/arXiv.2203.05306         |
| GrainSpaceW   | <a href="https://github.com/hellodfan/GrainSpace">https://github.com/hellodfan/GrainSpace</a>                                                                                     | 10.48550/arXiv.2203.05306         |
| GrainSpaceR   | <a href="https://github.com/hellodfan/GrainSpace">https://github.com/hellodfan/GrainSpace</a>                                                                                     | 10.48550/arXiv.2203.05306         |
| Varieties     | <a href="https://www.muratkoklu.com/datasets/">https://www.muratkoklu.com/datasets/</a>                                                                                           | 10.1109/ICDABI56818.2022.10041591 |
| Durum         | <a href="https://www.muratkoklu.com/datasets/vtd_hnd11.php">https://www.muratkoklu.com/datasets/vtd_hnd11.php</a>                                                                 | 10.1016/j.compag.2019.105016      |
| GWHD2021      | <a href="http://www.global-heat.com/#about">http://www.global-heat.com/#about</a>                                                                                                 | 34778804                          |
| PlantVillageM | <a href="https://github.com/spMohanty/PlantVillage-Dataset">https://github.com/spMohanty/PlantVillage-Dataset</a>                                                                 | -                                 |
| PlantVillageS | <a href="https://github.com/spMohanty/PlantVillage-Dataset">https://github.com/spMohanty/PlantVillage-Dataset</a>                                                                 | -                                 |
| Leafs_R       | <a href="https://www.kaggle.com/datasets/shayanriyaz/riceleafs">https://www.kaggle.com/datasets/shayanriyaz/riceleafs</a>                                                         | -                                 |
| LeafDiseaseM  | <a href="https://www.kaggle.com/datasets/smaranjitghose/corn-or-maize-leaf-disease-dataset">https://www.kaggle.com/datasets/smaranjitghose/corn-or-maize-leaf-disease-dataset</a> | -                                 |
| LeafW         | <a href="https://www.kaggle.com/datasets/olyadgetch/wheat-leaf-dataset">https://www.kaggle.com/datasets/olyadgetch/wheat-leaf-dataset</a>                                         | -                                 |
| WGSR*         | -                                                                                                                                                                                 | 37304154                          |
| RootW         | <a href="https://doi.org/10.5524/100343">https://doi.org/10.5524/100343</a>                                                                                                       | 29020747                          |
| ShootW        | <a href="https://doi.org/10.5524/100343">https://doi.org/10.5524/100343</a>                                                                                                       | 29020747                          |
| RootNav2W     | <a href="http://gigadb.org/dataset/100651">http://gigadb.org/dataset/100651</a>                                                                                                   | 31702012                          |
| RootNav2A     | <a href="http://gigadb.org/dataset/100651">http://gigadb.org/dataset/100651</a>                                                                                                   | 31702012                          |
| RootNav2R     | <a href="http://gigadb.org/dataset/100651">http://gigadb.org/dataset/100651</a>                                                                                                   | 31702012                          |
| GWHD2020      | <a href="https://zenodo.org/record/4298502">https://zenodo.org/record/4298502</a>                                                                                                 | 33313551                          |
| CosegPPB      | <a href="https://zenodo.org/record/5117176">https://zenodo.org/record/5117176</a>                                                                                                 | 34473794                          |
| CosegPPF      | <a href="https://zenodo.org/record/5117176">https://zenodo.org/record/5117176</a>                                                                                                 | 34473794                          |
| DeepPheno2017 | <a href="https://figshare.com/s/e18a978267675059578f">https://figshare.com/s/e18a978267675059578f</a>                                                                             | 30087695                          |
| ACID          | <a href="http://plantimages.nottingham.ac.uk/">http://plantimages.nottingham.ac.uk/</a>                                                                                           | 10.1109/ICCVW.2017.241            |
| MAU-PID_A     | <a href="http://cvlab.cse.msu.edu/multi-modality-imagery-database-msu-pid.html">http://cvlab.cse.msu.edu/multi-modality-imagery-database-msu-pid.html</a>                         | 10.1007/s00138-015-0734-6         |
| MAU-PID_B     | <a href="http://cvlab.cse.msu.edu/multi-modality-imagery-database-msu-pid.html">http://cvlab.cse.msu.edu/multi-modality-imagery-database-msu-pid.html</a>                         | 10.1007/s00138-015-0734-6         |
| WeedMap       | <a href="https://projects.asl.ethz.ch/datasets/doku.p">https://projects.asl.ethz.ch/datasets/doku.p</a>                                                                           | doi.org/10.3390/rs10091423        |

|                        |                                                                                                                                                                              |                              |
|------------------------|------------------------------------------------------------------------------------------------------------------------------------------------------------------------------|------------------------------|
|                        | hp?id=weedmap:remotesensing2018weed<br>map                                                                                                                                   |                              |
| PlantStress            | <a href="https://projects.asl.ethz.ch/datasets/doku.php?id=2018plantstressphenotyping">https://projects.asl.ethz.ch/datasets/doku.p<br/>hp?id=2018plantstressphenotyping</a> | 30774703                     |
| SoybeanLeaves          | <a href="https://data.mendeley.com/datasets/bycbh73438/1">https://data.mendeley.com/datasets/bycbh<br/>73438/1</a>                                                           | 35028343                     |
| WeedDetectSoy          | <a href="https://data.mendeley.com/datasets/3fmjm7ncc6/2">https://data.mendeley.com/datasets/3fmjm<br/>7ncc6/2</a>                                                           | 10.1016/j.compag.2017.10.027 |
| CassavaDisease         | <a href="https://www.kaggle.com/c/cassava-disease/data">https://www.kaggle.com/c/cassava-diseas<br/>e/data</a>                                                               | 10.48550/arXiv.1908.02900    |
| CassavaLeafDis         | <a href="https://www.kaggle.com/c/cassava-leaf-disease-classification/data">https://www.kaggle.com/c/cassava-leaf-di<br/>sease-classification/data</a>                       | 10.48550/arXiv.1908.02900    |
| CassavaRoot            | <a href="https://data.mendeley.com/datasets/gvp7vshvnh/3">https://data.mendeley.com/datasets/gvp7v<br/>shvnh/3</a>                                                           | 32904393                     |
| DiseaseNLBboom         | <a href="https://osf.io/p67rz/">https://osf.io/p67rz/</a>                                                                                                                    | 29970178                     |
| DiseaseNLBdrone        | <a href="https://osf.io/p67rz/">https://osf.io/p67rz/</a>                                                                                                                    | 29970178                     |
| DiseaseNLBhand<br>held | <a href="https://osf.io/p67rz/">https://osf.io/p67rz/</a>                                                                                                                    | 29970178                     |
| WGSS*                  | -                                                                                                                                                                            | -                            |
| WGSW144*               | -                                                                                                                                                                            | -                            |
| WGSW145*               | -                                                                                                                                                                            | -                            |
| WGSW151*               | -                                                                                                                                                                            | -                            |
| WGSW152*               | -                                                                                                                                                                            | -                            |
| WGSW165*               | -                                                                                                                                                                            | -                            |
| WGSW166*               | -                                                                                                                                                                            | -                            |
| WGSW172*               | -                                                                                                                                                                            | -                            |
| WGSW173*               | -                                                                                                                                                                            | -                            |
| WGSW179*               | -                                                                                                                                                                            | -                            |
| WGSW180*               | -                                                                                                                                                                            | -                            |
| WGSW186*               | -                                                                                                                                                                            | -                            |
| WGSW187*               | -                                                                                                                                                                            | -                            |
| WGSW193*               | -                                                                                                                                                                            | -                            |
| WGSW194*               | -                                                                                                                                                                            | -                            |
| WGSW200*               | -                                                                                                                                                                            | -                            |
| WGSW201*               | -                                                                                                                                                                            | -                            |

---

Note: \* indicates it is in-house, - not available.

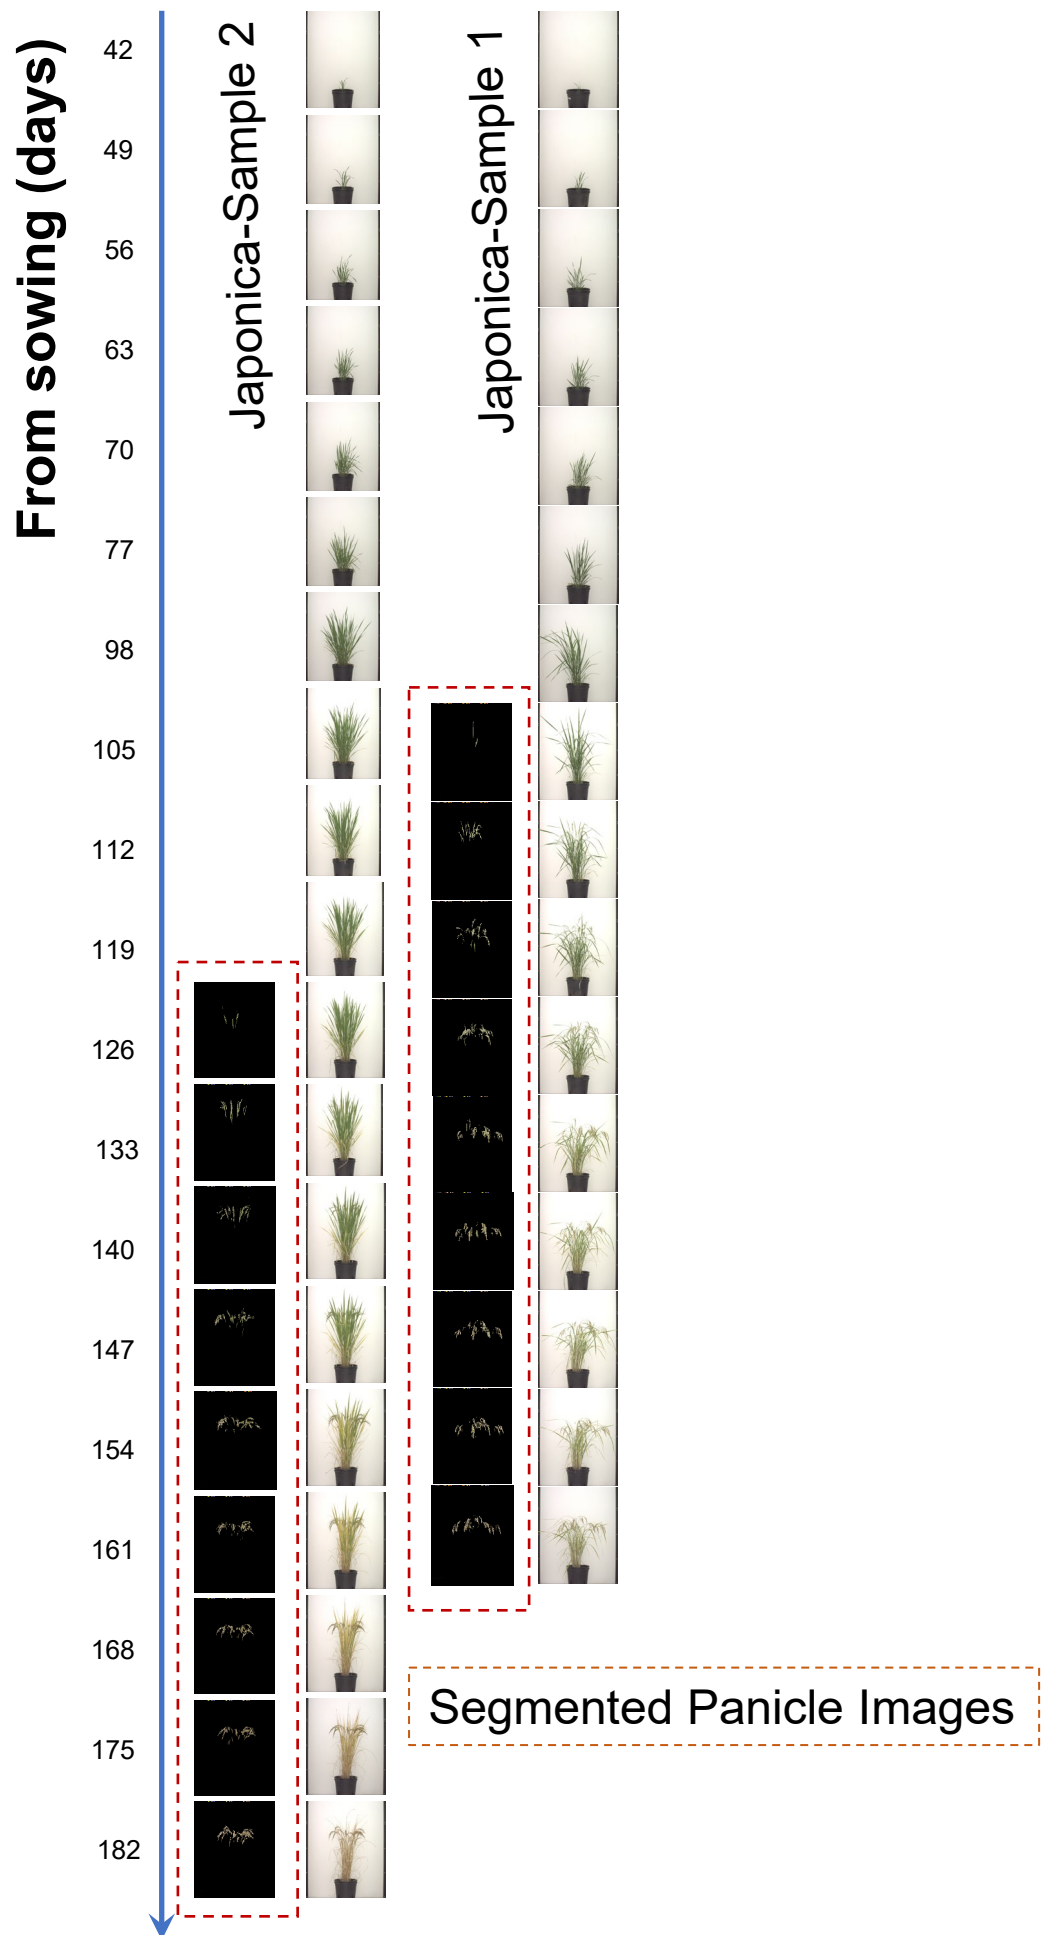

**Supplementary Figure S1.** The schematic of rice images and segmented panicle images during the whole growth period.

**Supplementary Table S2.** Description of the ten indicators that determine the evaluation score of a dataset

| Indicator name | Description                                                                                                                                                                                                                                                                                                                                                              |
|----------------|--------------------------------------------------------------------------------------------------------------------------------------------------------------------------------------------------------------------------------------------------------------------------------------------------------------------------------------------------------------------------|
| Images         | The total number of images in the dataset. A substantial account of plant image samples provides rich plant categories and features, contributing to paradigm-shifting in image-based phenotyping with sufficient training sets (1).                                                                                                                                     |
| Resolution     | The average of all image resolutions in the dataset. High-resolution images provide more details and clarity, which are crucial for plant identification and analysis tasks.                                                                                                                                                                                             |
| StorageSize    | The storage size of the dataset. A larger storage size suggests the dataset includes more image samples and a diverse range of plant features.                                                                                                                                                                                                                           |
| Labels         | The total number of the annotated instance in the dataset. A higher count of labelled instances provides more samples for training and validation, contributing to improved model performance.                                                                                                                                                                           |
| Tasks          | Quantifying the potential applications of the image dataset. The versatility and applicability of the dataset extend to a wide range of tasks, including but not limited to fine-grained recognition and disease detection. Thus, more potential applications of the dataset are invaluable resources for researchers and practitioners seeking a comprehensive dataset. |
| WithGT         | Whether the dataset contains label information. The presence of plant class or attribute labels enables supervised learning tasks such as plant classification and detection.                                                                                                                                                                                            |
| WithTrait      | Whether the dataset contains phenotypic traits analysed by image processing. The inclusion of additional trait data derived from plant images, such as plant height or green projected area, offers valuable digital characteristics that significantly contribute to facilitating further analysis, knowledge discovery, and reusability.                               |

---

|               |                                                                                                                                                                                                                                                                                                                                                                                                                                                                                                                    |
|---------------|--------------------------------------------------------------------------------------------------------------------------------------------------------------------------------------------------------------------------------------------------------------------------------------------------------------------------------------------------------------------------------------------------------------------------------------------------------------------------------------------------------------------|
| Devices       | Quantifying the device prototypes in the dataset. Images captured from devices ensure the dataset contains multi-visual features, benefiting plant image recognition and analysis tasks.                                                                                                                                                                                                                                                                                                                           |
| SamplingSites | Quantifying the geographic locations of image dataset sampling (from several experimental sites). The incorporation of images taken from various experiment locations holds tremendous importance as it exemplifies the extensive scope and practicality of the dataset. By encompassing images from diverse environments, the dataset can precisely portray and capture the inherent diversities present in plants across different settings, thereby enhancing its overall representativeness and applicability. |
| Gini          | Class balance, as measured by the Gini index, serves as a means to evaluate the distribution equilibrium within an image classification dataset. A higher Gini index value signifies a more uniform allocation of samples among each category.                                                                                                                                                                                                                                                                     |

---

**Reference:**

1. Pound, M.P., Atkinson, J.A., Townsend, A.J., Wilson, M.H., Griffiths, M., Jackson, A.S., Bulat, A., Tzimiropoulos, G., Wells, D.M., Murchie, E.H. *et al.* (2017) Deep machine learning provides state-of-the-art performance in image-based plant phenotyping. *GigaScience*, **6**, 1-10.

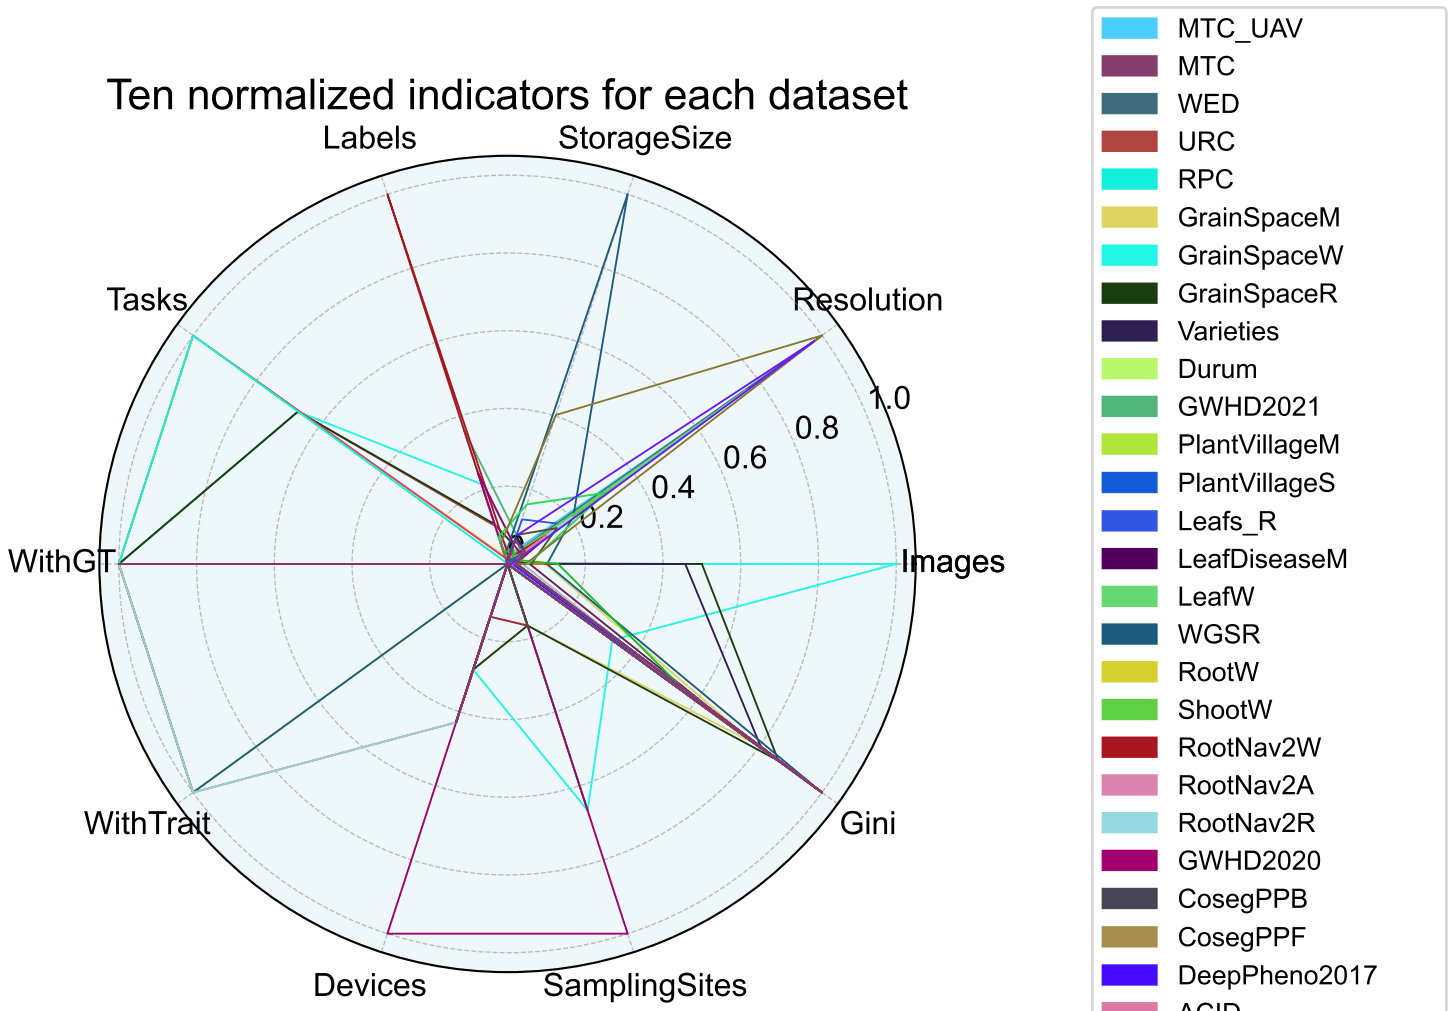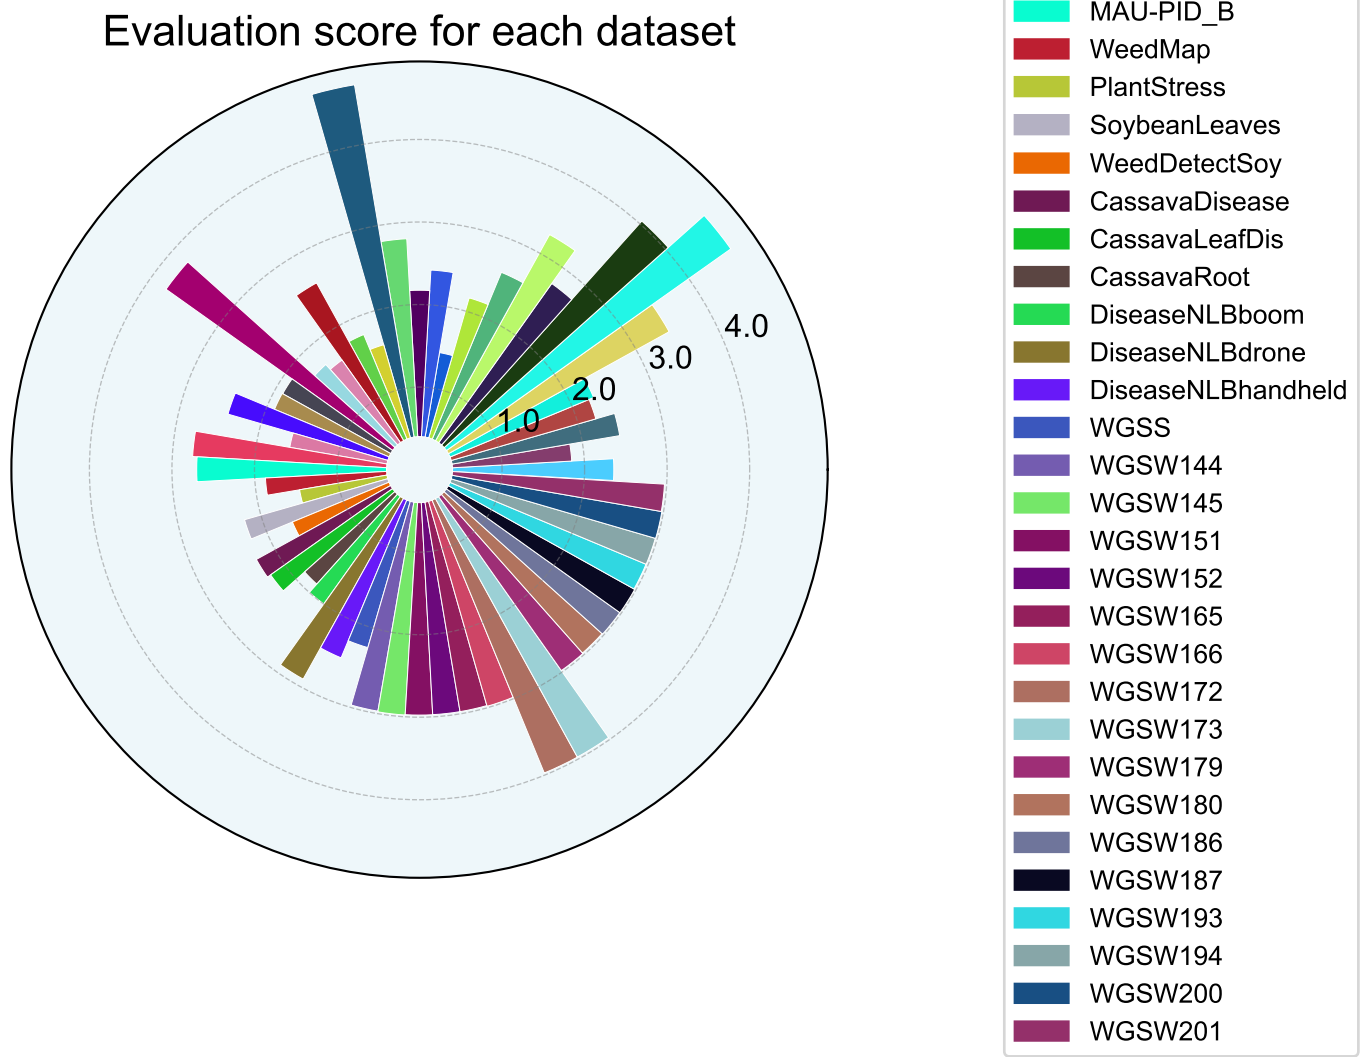

Supplementary Figure S2. The ten indicators and the final evaluation score of each dataset.

**Supplementary Table S3.** The definitions and categories of i-traits

| Category               | i-trait                                                                                                             |
|------------------------|---------------------------------------------------------------------------------------------------------------------|
| Plant related traits   | The height of whole plant                                                                                           |
|                        | The total projected area of whole plant                                                                             |
|                        | The ratio of height and width of whole plant                                                                        |
|                        | The ratio of total projected area and height of whole plant                                                         |
|                        | The ratio of yellow projected area and total projected area of whole plant                                          |
| Panicle related traits | The total projected area of panicle                                                                                 |
|                        | Value of final total projected area of panicle                                                                      |
|                        | The ratio of projected area of panicle and whole plant                                                              |
|                        | The ratio of yellow projected area and total projected area of panicle                                              |
|                        | The yellow projected area of panicle                                                                                |
| Culm related traits    | The height of plant culm                                                                                            |
|                        | The total projected area of plant culm                                                                              |
|                        | The ratio of projected area and height of plant culm                                                                |
|                        | The ratio of green projected area and total projected area of plant culm                                            |
|                        | The ratio of yellow projected area and total projected area of plant culm                                           |
|                        | The ratio of height of culm and whole plant                                                                         |
| Grain related traits   | Mean value of grain length                                                                                          |
|                        | Mean value of grain length / width ratio                                                                            |
|                        | Mean value of grain width                                                                                           |
|                        | Total spikelet number                                                                                               |
|                        | 1,000-grain weight                                                                                                  |
|                        | Yield per plant (filled grain weight)                                                                               |
|                        | Spikelet fertility                                                                                                  |
|                        | Filled grain number                                                                                                 |
| Phenological traits    | The days to harvest from sowing                                                                                     |
|                        | The days to the beginning of heading from sowing                                                                    |
|                        | The days to the maximum value of height of whole plant from sowing                                                  |
|                        | The days to the maximum value of total projected area of whole plant from sowing                                    |
|                        | The days to the maximum value of ratio of yellow projected area and total projected area of whole plant from sowing |
|                        | The days to the maximum value of green projected area of whole plant from sowing                                    |
|                        | The days to the maximum value of total projected area of whole plant from heading                                   |
|                        | The days to the maximum value of the ratio of projected area of panicle and whole plant from heading                |
|                        | The days to the maximum value of ratio of yellow projected area and total projected area of panicle from heading    |
|                        | The days to the maximum value of yellow projected area of panicle                                                   |

---

|                                    |                                                                                                     |
|------------------------------------|-----------------------------------------------------------------------------------------------------|
|                                    | from heading                                                                                        |
| Panicle development related traits | Value of daily growth of total projected area of panicle                                            |
|                                    | Value of daily growth of ratio of projected area of panicle and whole plant                         |
|                                    | Value of daily growth of ratio of yellow projected area and total projected area of panicle         |
|                                    | Value of daily growth of yellow projected area of panicle                                           |
| Plant growth related traits        | Value of daily growth of height of whole plant                                                      |
|                                    | Value of daily growth of total projected area of whole plant                                        |
|                                    | Value of daily growth of the ratio of yellow projected area and total projected area of whole plant |
| Panicle related traits             | Correlation                                                                                         |
|                                    | Small gradient advantage                                                                            |
|                                    | Large gradient advantage                                                                            |
|                                    | Energy                                                                                              |
|                                    | Uneven distribution of gray scale                                                                   |
|                                    | Uneven gradient distribution                                                                        |
|                                    | Gray mean                                                                                           |
|                                    | Gradient mean                                                                                       |
|                                    | Gray entropy                                                                                        |
|                                    | Gradient entropy                                                                                    |
|                                    | Entropy of mixing                                                                                   |
|                                    | Difference moment                                                                                   |
|                                    | Partial moment of deficit                                                                           |
|                                    | Gray standard deviation                                                                             |
|                                    | Gradient standard deviation                                                                         |

---



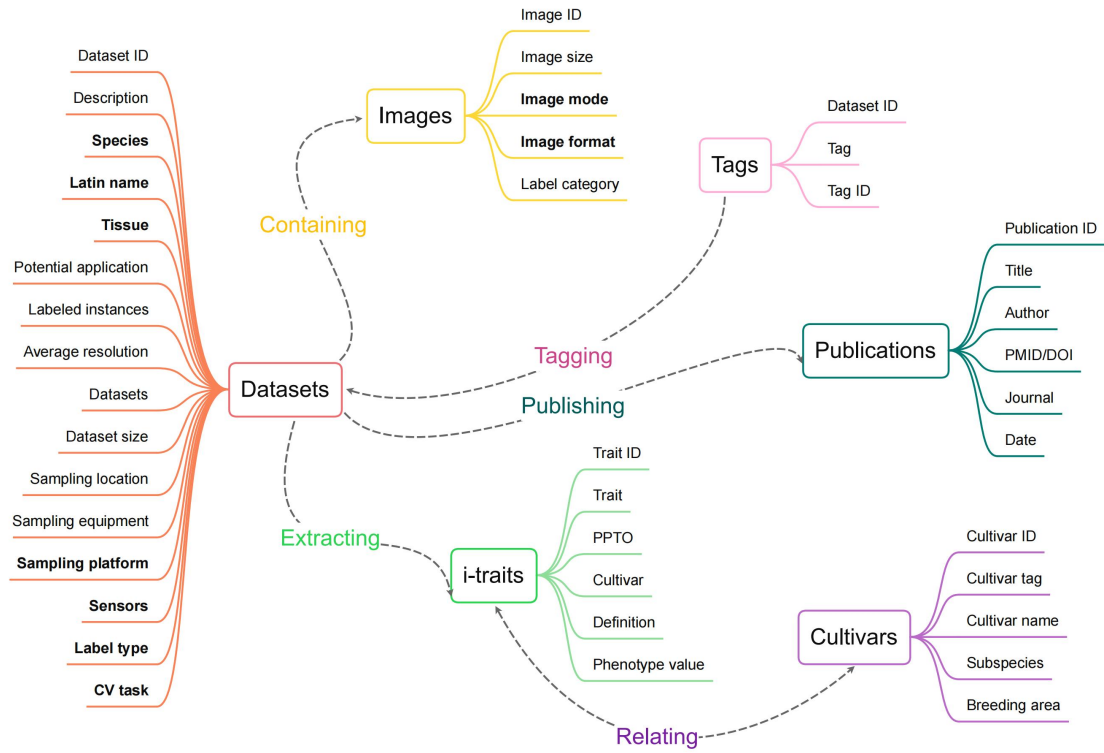

**Supplementary Figure S3.** The metadata for datasets and images (the fields in bold are controlled vocabularies).
